# Supplementary material for: In vivo interferon-gamma induced changes in gene expression dramatically alter neutrophil phenotype
Source: PubMed Central journal article supplement (PMC8812922; doi:10.1371/journal.pone.0263370), 2022-02-03

**Supplementary Information (S2).** Western blot raw images for Figure 8.

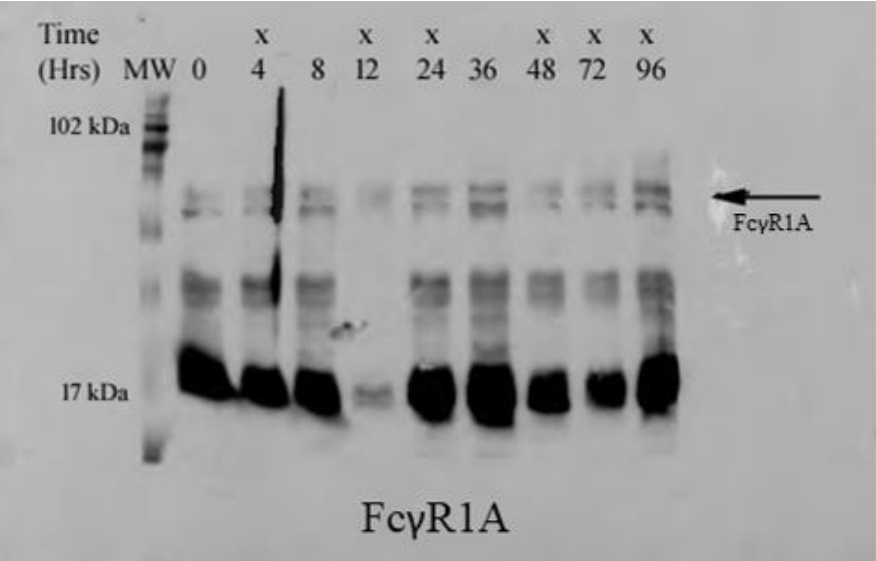

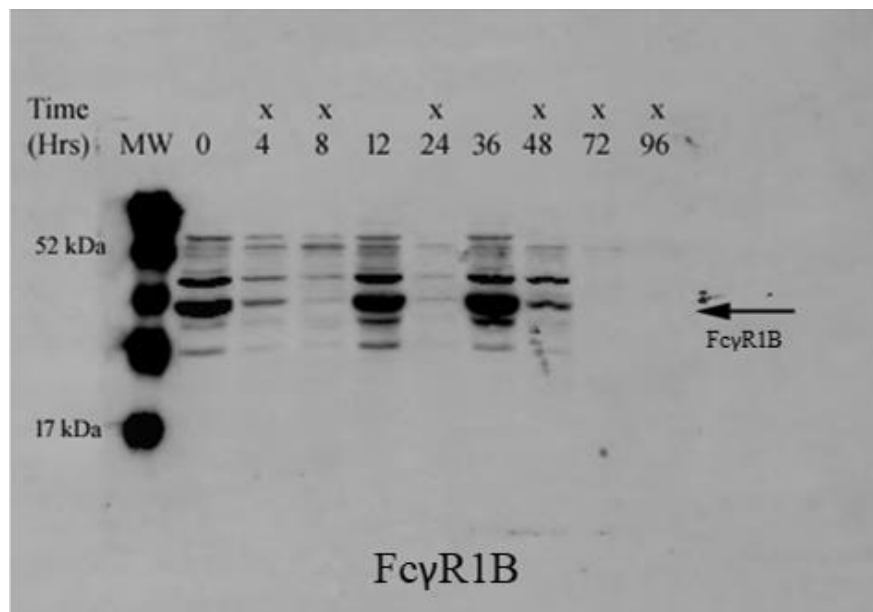

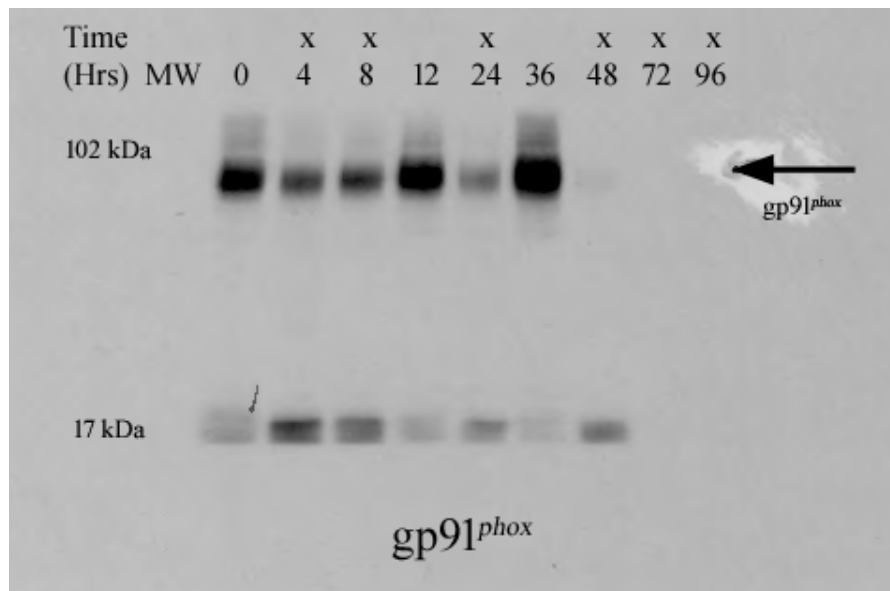

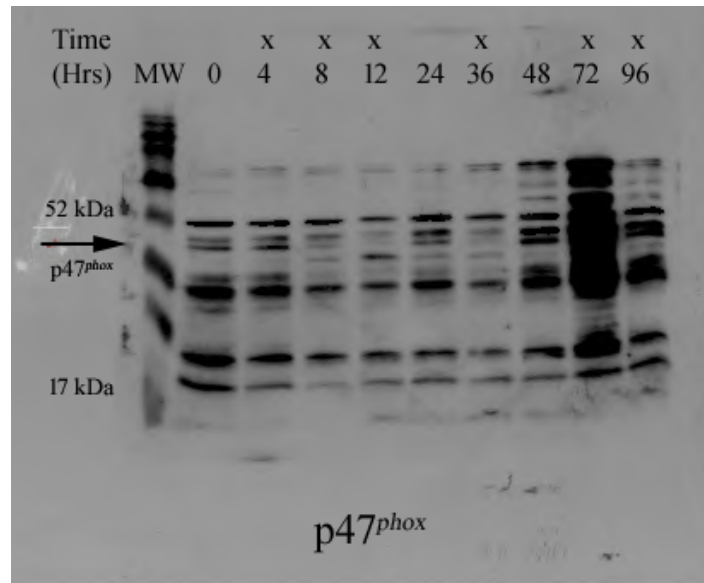



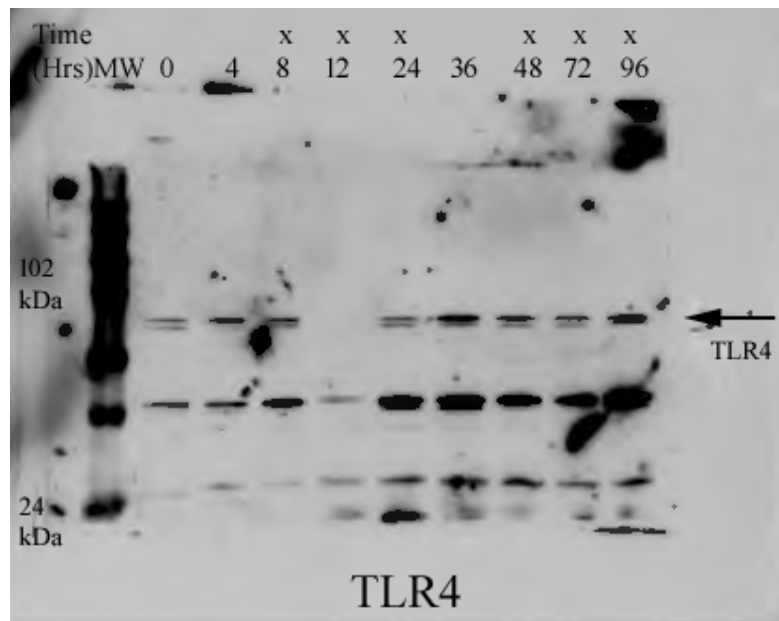







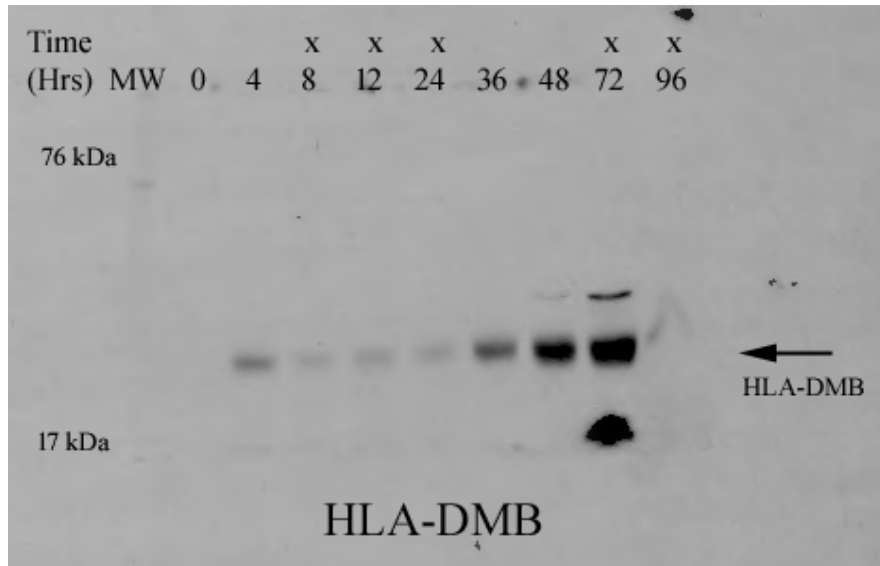

Supplement: pone.0263370.s003.pdf [file pone.0263370.s003.pdf]
